# Supplementary material for: Targeting Trypanothione Reductase, a Key Enzyme in the Redox Trypanosomatid Metabolism, to Develop New Drugs against Leishmaniasis and Trypanosomiases
Source: PubMed Central journal article supplement (PMC7221613; doi:10.3390/molecules25081924), 2020-04-21
Supplement: molecules-25-01924-s001.pdf [file molecules-25-01924-s001.pdf]

# Targeting Trypanothione Reductase, a Key Enzyme in the Redox Trypanosomatid Metabolism, to Develop New Drugs against Leishmaniasis and Trypanosomiasis

Theo Battista <sup>1</sup>, Gianni Colotti <sup>2</sup>, Andrea Ilari <sup>2</sup> and Annarita Fiorillo <sup>1,\*</sup>

<sup>1</sup> Department of Biochemical Sciences, Sapienza University, P.le A.Moro 5, 00185, Rome, Italy; theo.battista@uniroma1.it

<sup>2</sup> Institute of Molecular Biology and Pathology, Italian National Research Council, IBPM-CNR, c/o Department of Biochemical Sciences, Sapienza University, P.le A.Moro 5, 00185, Rome, Italy; gianni.colotti@cnr.it (G.C.); andrea.ilari@cnr.it (A.I.)

\* Correspondence: annarita.fiorillo@uniroma1.it; Tel.: +39-064-991-0910

**Table S1. IUPAC name and smiles of inhibitors.**

| PDB ID | Ligand PDB ID | iupac name                                                                                                                                                               | smiles                                                                              | structure                                                                             |
|--------|---------------|--------------------------------------------------------------------------------------------------------------------------------------------------------------------------|-------------------------------------------------------------------------------------|---------------------------------------------------------------------------------------|
| 4NEV   | 2JR           | 5-{5-[1-(pyrrolidin-1-yl)cyclohexyl]-1,3-thiazol-2-yl}-1 <i>H</i> -indole                                                                                                | <chem>c1cc2c(cc[nH]2)cc1c3ncc(s3)C4(CCCC4)N5CCCC5</chem>                            | 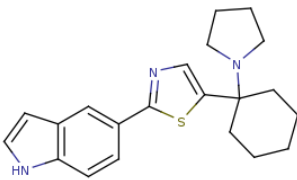 |
| 4NEW   | 2JR           | 5-{5-[1-(pyrrolidin-1-yl)cyclohexyl]-1,3-thiazol-2-yl}-1 <i>H</i> -indole                                                                                                | <chem>c1cc2c(cc[nH]2)cc1c3ncc(s3)C4(CCCC4)N5CCCC5</chem>                            |  |
| 6ER5   | BVN           | 2-(diethylamino)ethyl 4-((3-(4-nitrophenyl)-3-oxopropyl)amino)benzoate                                                                                                   | <chem>CCN(CC)CCOC(=O)c1ccc(cc1)NCCC(=O)c2ccc(cc2)[N+](=O)[O-]</chem>                |  |
| 6OEZ   | M9J           | <i>N</i> -(cyclobutylmethyl)-3-{5-[1-(pyrrolidin-1-yl)cyclohexyl]-2-(1-[(2 <i>S</i> )-pyrrolidin-2-yl]methyl)-1 <i>H</i> -indol-5-yl]-1,3-thiazol-4-yl}prop-2-yn-1-amine | <chem>c1cc2c(ccn2C[C@@H]3CCCCN3)cc1c4nc(c(s4)C5(CCCCC5)N6CCCC6)C#CCNCC7CCCC7</chem> |  |

|      |     |                                                                                                                                                |                                                                                  |  |
|------|-----|------------------------------------------------------------------------------------------------------------------------------------------------|----------------------------------------------------------------------------------|--|
| 6OEY | M9S | 5-{5-[1-(pyrrolidin-1-yl)cyclohexyl]-1,3-thiazol-2-yl]-1-[(2S)-pyrrolidin-2-yl]methyl}-1H-indole                                               | <chem>c1cc2c(ccn2C[C@@H]3CCCCN3)cc1c4ncc(s4)C5(CCCCC5)N6CCCC6</chem>             |  |
| 60EX | M9Y | 3-(2-{1-[2-(piperidin-4-yl)ethyl]-1H-indol-5-yl]-5-[1-(pyrrolidin-1-yl)cyclohexyl]-1,3-thiazol-4-yl)-N-(2,2,2-trifluoroethyl)prop-2-yn-1-amine | <chem>c1cc2c(ccn2CCC3CCNCC3)cc1c4nc(c(s4)C5(CCCCC5)N6CCCC6)C#CCNCC(F)(F)F</chem> |  |
| 1GXF | QUM | (4R)-N'-(6-chloro-2-methoxy-acridin-9-yl)-N,N-diethyl-pentane-1,4-diamine                                                                      | <chem>C[C@H](CCCN(CCCl)CCCl)/N=C\1/c2ccc(cc2Nc3c1cc(c3)OC)Cl</chem>              |  |
| 6BU7 | RD0 | 1-[2-(piperidin-4-yl)ethyl]-5-{5-[1-(pyrrolidin-1-yl)cyclohexyl]-1,3-thiazol-2-yl}-1H-indole                                                   | <chem>c1cc2c(ccn2CCC3CCNCC3)cc1c4ncc(s4)C5(CCCCC5)N6CCCC6</chem>                 |  |
| 6BTL | RD7 | 1-[2-(piperazin-1-yl)ethyl]-5-{5-[1-(pyrrolidin-1-yl)cyclohexyl]-1,3-thiazol-2-yl}-1H-indole                                                   | <chem>c1cc2c(ccn2CCN3CCNCC3)cc1c4ncc(s4)C5(CCCCC5)N6CCCC6</chem>                 |  |
| 5EBK | RDS | 6-sec-Butoxy-2-[(3-chlorophenyl)sulfanyl]-4-pyrimidinamine                                                                                     | <chem>CC[C@H](C)Oc1cnc(nc1S2ccccc2)Cl)N</chem>                                   |  |

|      |     |                                                                                                          |                                                                                    |  |
|------|-----|----------------------------------------------------------------------------------------------------------|------------------------------------------------------------------------------------|--|
| 2YAU | TS8 | 3,4,5-triacetyloxy-6-(acetyloxymethyl)oxane-2-thiol                                                      | <chem>CC(=O)OC[C@@H]1[C@H]([C@@H]([C@H]([C@@H](O1)S)OC(=O)C)OC(=O)C)OC(=O)C</chem> |  |
| 2WP5 | WP5 | methyl [(4S)-6-bromo-2-methyl-4-phenylquinazolin-3(4H)-yl]acetate                                        | <chem>CC1=Nc2ccc(cc2[C@@H](N1CC(=O)OC)c3ccccc3)Br</chem>                           |  |
| 2WP6 | WP6 | (4S)-3-benzyl-6-chloro-2-methyl-4-phenyl-3,4-dihydroquinazoline                                          | <chem>CC1=Nc2ccc(cc2[C@@H](N1Cc3ccccc3)c4ccccc4)Cl</chem>                          |  |
| 2WPC | WP7 | (4S)-6-chloro-3-{2-[4-(furan-2-ylcarbonyl)piperazin-1-yl]ethyl}-2-methyl-4-phenyl-3,4-dihydroquinazoline | <chem>CC1=Nc2ccc(cc2[C@@H](N1CCN3CCN(CC3)C(=O)c4ccc(O4)c5ccccc5)Cl</chem>          |  |
| 2WPE | WPE | N-[2-[(4S)-6-chloro-2-methyl-4-phenylquinazolin-3(4h)-yl]ethyl]furan-2-carboxamide                       | <chem>CC1=Nc2ccc(cc2[C@@H](N1CCNC(=O)c3ccco3)c4ccccc4)Cl</chem>                    |  |
| 2WPF | WPF | 3-[(4S)-6-chloro-2-methyl-4-(4-methylphenyl)quinazolin-3(4h)-yl]-n,n-dimethylpropan-1-amine              | <chem>Cc1ccc(cc1)[C@H]2c3cc(ccc3N=C(N2CCN(C)C)C)Cl</chem>                          |  |

|             |     |                                                                                                                                                                                             |                                                                                                        |                                                                                     |
|-------------|-----|---------------------------------------------------------------------------------------------------------------------------------------------------------------------------------------------|--------------------------------------------------------------------------------------------------------|-------------------------------------------------------------------------------------|
| 4APN<br>(B) | JV0 | 4-[[1-(4-ethylphenyl)-2-methyl-5-(4-methylsulfanylphenyl)pyrrol-3-yl]methyl]thiomorpholine                                                                                                  | <chem>CCc1ccc(cc1)-n1c(C)c(CN2CCSCC2)cc1-c1ccc(SC)cc1</chem>                                           | 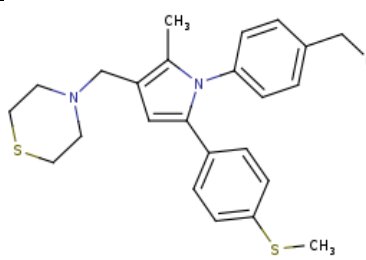  |
| 6I7N<br>(B) | H6H | ~{N}-(4-azanylbutyl)-~{N}-(2-azanyl-2-oxidanylidene-ethyl)-7-(3-azanyl-3-oxidanylidene-propyl)-4-(dimethylamino)-2-(2-naphthalen-2-ylethylamino)pyrrolo[2,3-d]pyrimidine-6-carboxamide      | <chem>CN(C)c1nc(NCCc2ccc3ccccc3c2)nc2n(CCC(N)=O)c(cc12)C(=O)N(CCCCN)CC(N)=O</chem>                     |   |
|             | JWZ | rac-4-(((3-(8-(2-((1R,2S,5R)-6,6-dimethylbicyclo[3.1.1]heptan-2-yl)ethyl)-4-oxo-1-phenyl-1,3,8-triazaspiro[4.5]decan-3-yl)propyl)(methylamino)methyl)-4-hydroxypiperidine-1-carboximidamide | <chem>N=C(N)N1CCC(O)(CC1)CN(C)CCCN6CN(c2ccccc2)C3(CCN(C)C3)CC[C@@H]5CC[C@H]4C[C@@H]5C4(C)C)C6=O</chem> |  |
